# Supplementary material
Source: PubMed Central journal article supplement (PMC3008538)
Supplement: supp_192_24_6465__1.pdf [file supp_192_24_6465__1.pdf]

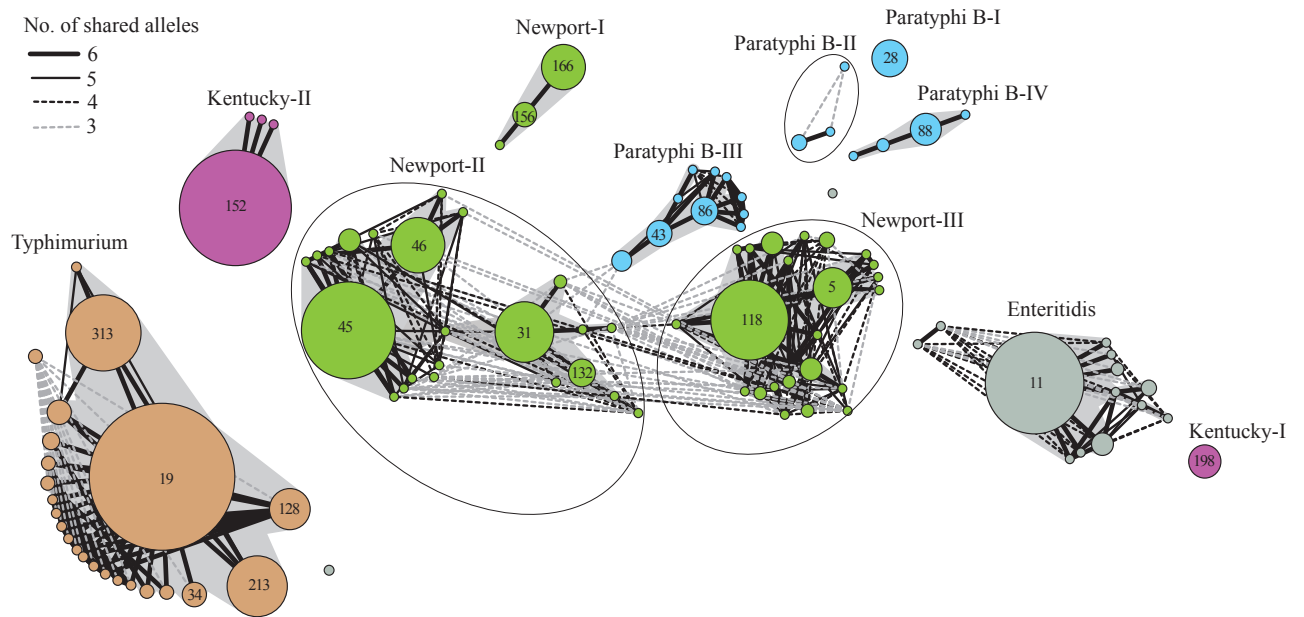

Supplementary Figure 1. An MSTree from the allelic profiles of isolates with crosslinks between STs sharing 3-6 alleles.
